# Supplementary material for: O-linked N-acetylglucosamine transferase enhances secretory clusterin expression via liver X receptors and sterol response element binding protein regulation in cervical cancer
Source: PubMed Central journal article supplement (PMC5797001; doi:10.18632/oncotarget.23588), 2017-12-21
Supplement: oncotarget-09-4625-s001.pdf [file oncotarget-09-4625-s001.pdf]

## O-linked N-acetylglucosamine transferase enhances secretory clusterin expression via liver X receptors and sterol response element binding protein regulation in cervical cancer

### SUPPLEMENTARY MATERIALS

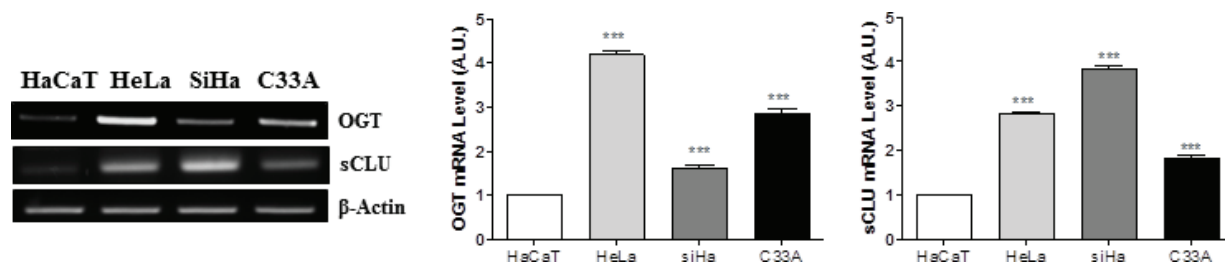

**Supplementary Figure 1: Expression levels of sCLU and OGT mRNA expression are increased in cervical cancer cell lines (HeLa, SiHa, C33A) compared to HaCaT cells.** mRNA expression levels of sCLU and OGT are analysed by RT-PCR respectively ( $n = 3$ ). Data are presented as mean  $\pm$  S.E.M. ( $n = 3$ ). \*\*\* $p < 0.001$  The oligonucleotide primers used for RT-PCR were as follows: OGT, 5'-CGGGCTATCGAACTACAACCA-3' (forward) and 5'- CCCATATTAGAGTAGGCATCAGCAAAG-3' (reverse); sCLU, 5'-AGATCAGCGCCTGAGAAGCT-3' (forward) and 5'- GGGACCAGTGTACCTTCTCG-3' (reverse) ;  $\beta$ -actin, 5'-CTGGCACCACACCTTCTACAATG-3' (forward) and 5'- CCTCGTAGATGGGCACAGTGTG-3' (reverse). OGT cycle- 25cycle 35cycle,  $\beta$ -actin-20 cycle.

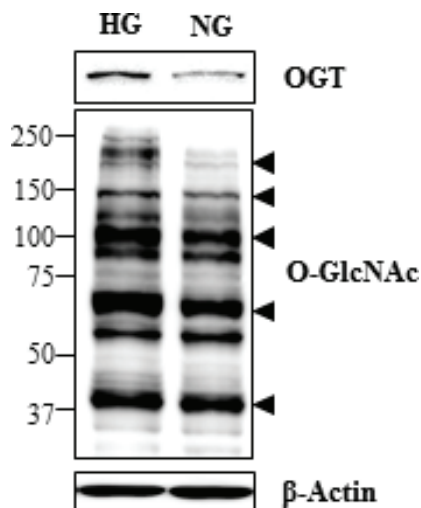

**Supplementary Figure 2: Expressions of OGT and O-G1cNAc are decreased by glucose depletion condition.** HeLa cells were incubated for 24 h under no glucose (NG) with serum free or high-glucose (HG; 25 mM) with serum free conditions. Total proteins were extracted and analysed by western blot, respectively ( $n = 3$ ).

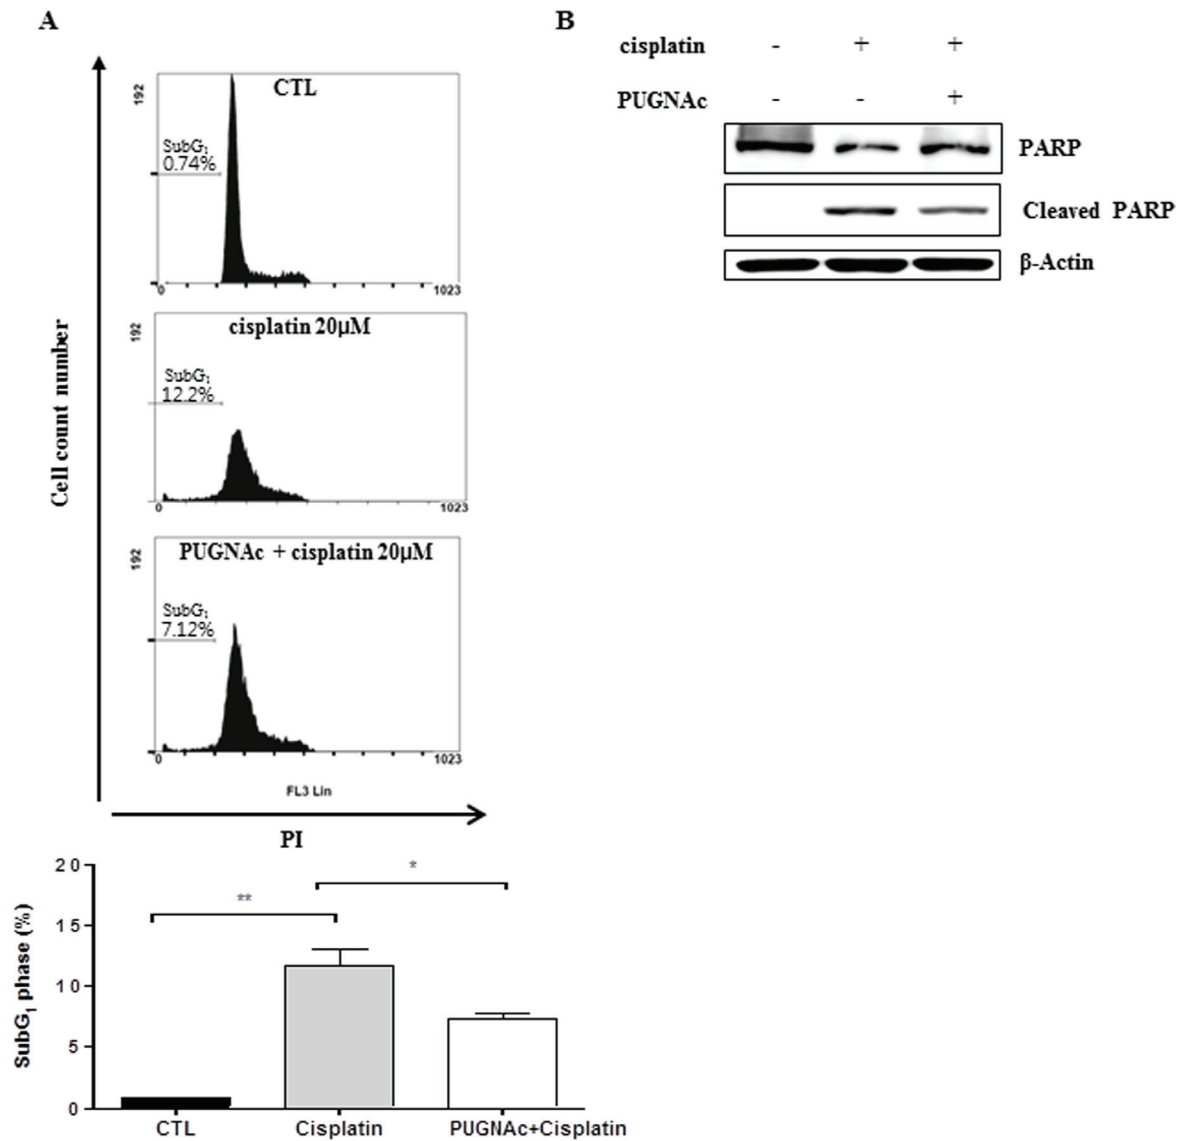

**Supplementary Figure 3: Increased O-GlcNAcylation rescues cell death in HeLa cell.** (A) HeLa cells ( $1 \times 10^5$  cells/ml) treated with OGA inhibitor, PUGNAc (100 μM) for 24 h or after following treatment HeLa cells were treated with cisplatin (20 μM) for 24 h again. After that cells were harvested, fixed and stained with PI, then analysed by flow cytometry. Bar diagram indicates the percentage of cells in the SubG<sub>1</sub> phase of the cell cycle. Data are presented as mean  $\pm$  S.E.M. ( $n = 3$ ). \* $p < 0.05$ , \*\* $p < 0.01$  (B) Expression of PARP, cleaved PARP was analysed by western blot in HeLa cells treated with cisplatin for 24 h, after PUGNAc treatment.
